# Supplementary material for: Chemotherapeutic efficacies of a clofazimine and diminazene aceturate combination against piroplasm parasites and their AT-rich DNA-binding activity on Babesia bovis
Source: PubMed Central journal article supplement (PMC5654833; doi:10.1038/s41598-017-14304-0), 2017-10-24
Supplement: 41598_2017_14304_MOESM1_ESM.pdf [file 41598_2017_14304_MOESM1_ESM.pdf]

# **Chemotherapeutic efficacies of a clofazimine and diminazene aceturate combination against piroplasm parasites and their AT-rich DNA-binding activity on *Babesia bovis***

Bumduuren Tuvshintulga<sup>1,2</sup>, Mahmoud AbouLaila<sup>1,3</sup>, Thillaiampalam Sivakumar<sup>1</sup>, Dickson Stuart Tayebwa<sup>1</sup>, Sambuu Gantuya<sup>1,4</sup>, Khandsuren Naranbaatar<sup>4</sup>, Aki Ishiyama<sup>5</sup>, Masato Iwatsuki<sup>5</sup>, Kazuhiko Otoguro<sup>5</sup>, Satoshi Ōmura<sup>5</sup>, Mohamad Alaa Terkawi<sup>1,6</sup>, Azirwan Guswanto<sup>1</sup>, Mohamed Abdo Rizk<sup>1,7</sup>, Naoaki Yokoyama<sup>1</sup>, Ikuo Igarashi<sup>1\*</sup>

<sup>1</sup>National Research Center for Protozoan Diseases, Obihiro University of Agriculture and Veterinary Medicine, Inada-cho, Obihiro, Hokkaido 080-8555, Japan. <sup>2</sup>Laboratory of Molecular Genetics, Institute of Veterinary Medicine, Ulaanbaatar, Mongolia. <sup>3</sup>Department of Parasitology, Faculty of Veterinary Medicine, University of Sadat City, Sadat City 32511, Minoufiya, Egypt. <sup>4</sup>Laboratory of Arachno-Entomology and Protozoology, Institute of Veterinary Medicine, Ulaanbaatar, Mongolia. <sup>5</sup>Research Center for Tropical Diseases, Kitasato Institute for Life Sciences, Kitasato University, Tokyo, Japan. <sup>6</sup>Frontier Research Center for Advanced Material and Life Science, Department of Orthopedic Surgery, School of Medicine, Hokkaido University, Kita 21, Nishi 11, Kita-ku, Sapporo, Hokkaido 001-0021, Japan. <sup>7</sup>Department of Internal Medicine and Infectious Diseases, Faculty of Veterinary Medicine, Mansoura University, Mansura 35516, Dakahlia, Egypt

\*Corresponding author: Professor Ikuo Igarashi DVM, PhD,  
National Research Center for Protozoan Diseases, Obihiro University of Agriculture and Veterinary Medicine,  
Inada-cho, Obihiro, Hokkaido 080-8555, Japan  
E-mail address: igarcpmi@obihiro.ac.jp; Tel.: +81-155-49-5641 (Fax: -5643)

## Supplementary information

**Table S1. Percentage of nucleic acid contents in genes of *B. bovis*.**

| Organelles   | Genes              | A   | T   | C   | G   | AT  | CG  | Total |
|--------------|--------------------|-----|-----|-----|-----|-----|-----|-------|
| Nucleus      | <i>18S rRNA</i>    | 23% | 27% | 23% | 27% | 50% | 50% | 100%  |
|              | Tubulin beta chain | 30% | 21% | 26% | 23% | 51% | 49% | 100%  |
|              | Arm/cat*           | 24% | 30% | 21% | 25% | 54% | 46% | 100%  |
| Mitochondria | <i>cob</i>         | 26% | 41% | 14% | 19% | 68% | 32% | 100%  |
|              | <i>cox3</i>        | 31% | 40% | 13% | 15% | 71% | 29% | 100%  |
| Apicoplast   | <i>tufA</i>        | 39% | 31% | 18% | 13% | 69% | 31% | 100%  |
|              | <i>clpC</i>        | 43% | 37% | 10% | 10% | 79% | 21% | 100%  |

\* Armadillo/beta-catenin-like repeat domain containing protein

**Table S2. Primers used in this study for qPCR.**

| Genes              | Sequences                                                  | Description                                    |
|--------------------|------------------------------------------------------------|------------------------------------------------|
| <i>18S rRNA</i>    | GGACGCCTCGTTACTTTGAGA<br>AGGCGAAACCTGCTTGAAAC              | Internal control                               |
| Tubulin beta chain | CCTTATCCCCTTCCCCAGGT<br>AGTGGTGCGAATCCGATCAT               | Chromosomal gene                               |
| Arm/cat*           | TTCGTGAACAGGCTGTTTGG<br>CGGGAGAGTCACCTGCGAT                | Chromosomal gene                               |
| <i>cob</i>         | GGTTGGGCAATGCGTTATTT<br>ATGTAGCATCATGAAAAAGAAGCAA          | Mitochondrial gene encoding cytochrome b       |
| <i>cox3</i>        | TGATGGTTCAAATAGAGCAGAAGATT<br>GTAAAGCTACCCAGATTAATTCAACAA  | Mitochondrial gene of cytochrome c oxidase III |
| <i>tufA</i>        | AAAATATGATAACTGGTGCTGTACAAATG<br>GCATAGGACCGTCTGTAAAGAAATA | Apicoplast gene for elongation factor          |
| <i>clpC</i>        | GTTGTAAAGAGCATAAACAAGTCGTTTT<br>TGCCCCACTAGGACCACAAA       | Apicoplast gene encoding chaperon protein      |

\*Armadillo/beta-catenin-like repeat domain containing protein

**Figure S1.** Development stages of CF- or DA-treated *B. bovis*. Pair and single cell stages were counted within 400 iRBCs. (a) Pair-cell stage is considered to be a pear form of parasites, and single-cell stage is considered to be ring and degenerative forms of parasites. (b) Percentage of pair- or single-cell stages at 36 hours. (c) Percentage of pair- or single-cell stages at 48 hours. Asterisks indicate statistically significant ( $P < 0.01^{**}$  or  $0.05^*$ ) differences of percentages based on unpaired  $t$ -test analysis.

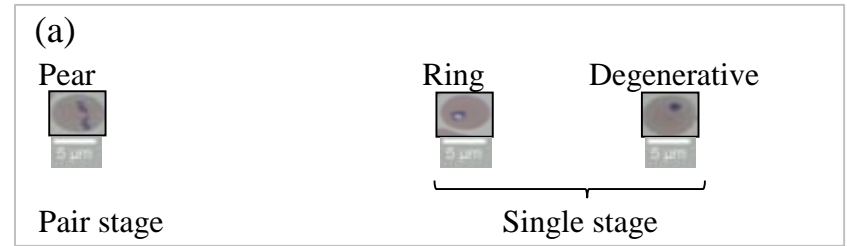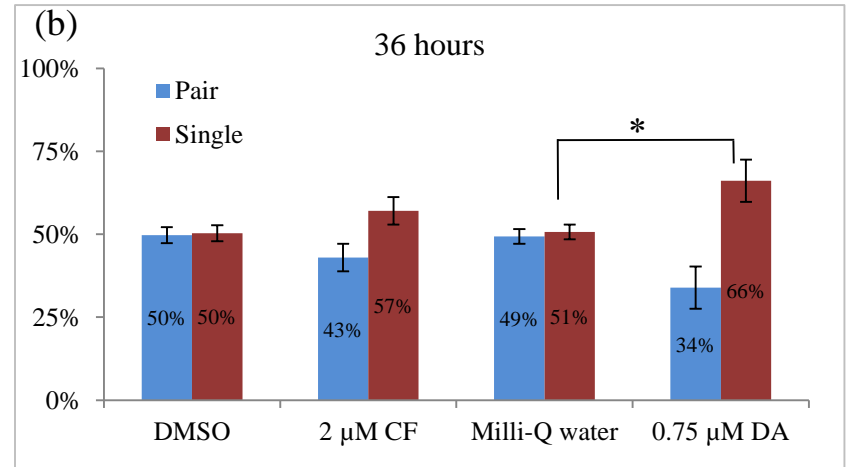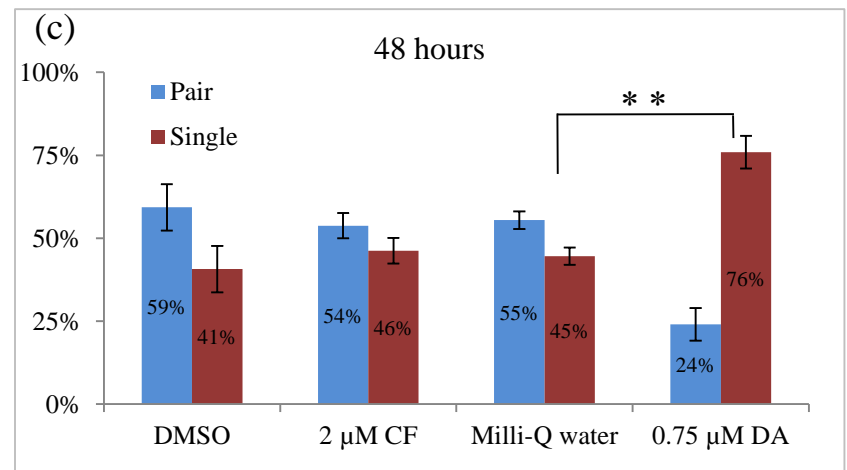

36 hours

Well-1

Well-2

Well-3

DMSO

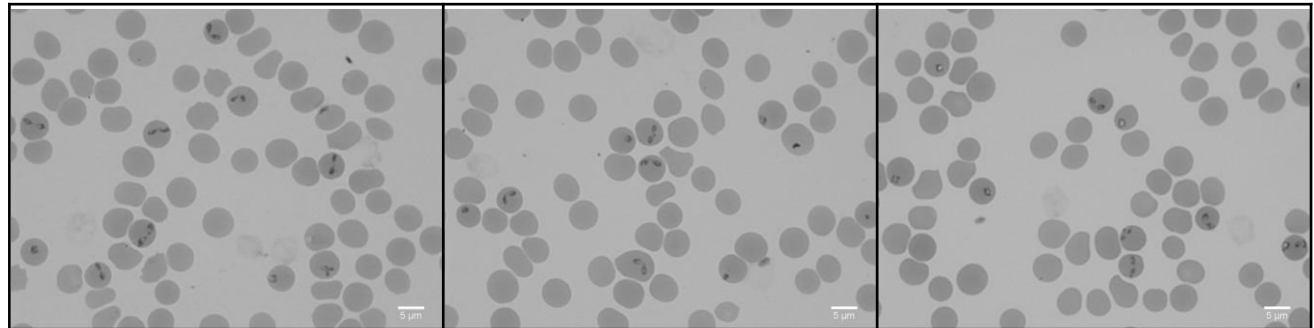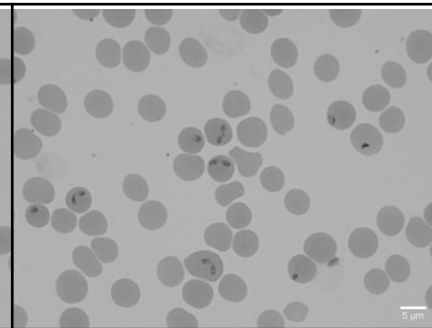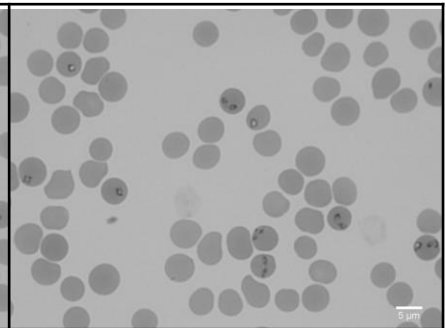

1 μM CF

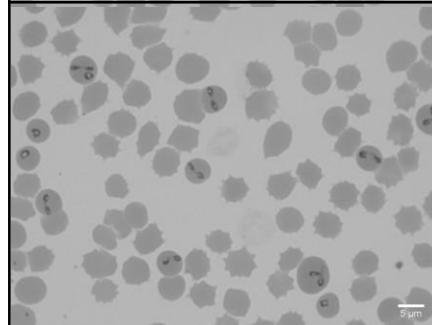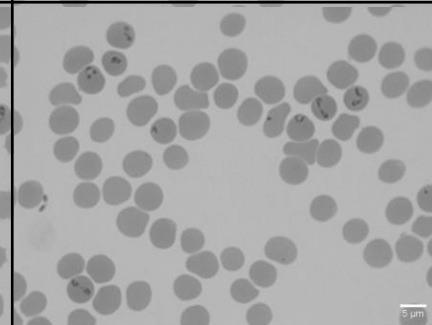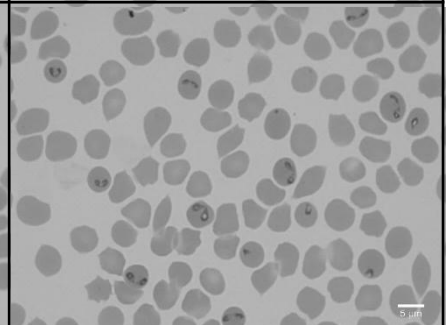

1.5 μM CF

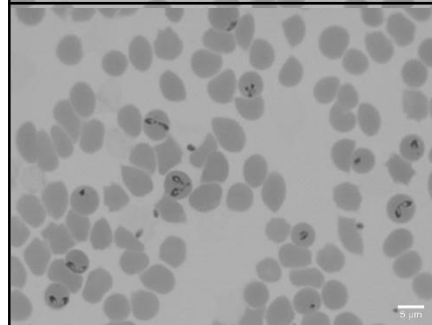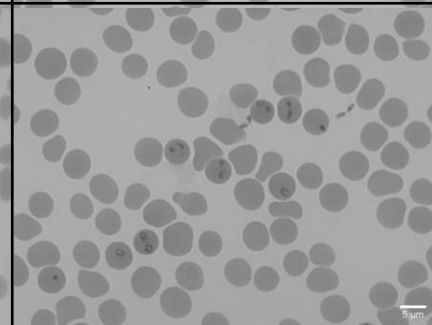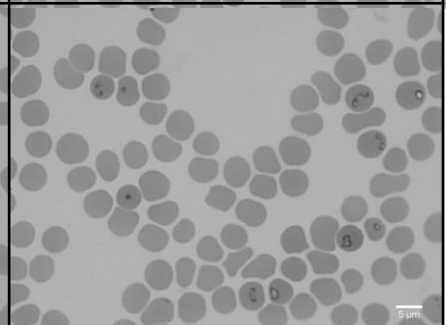

2 μM CF

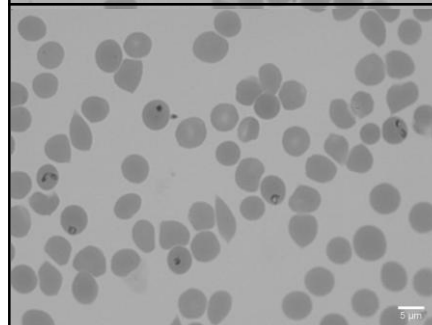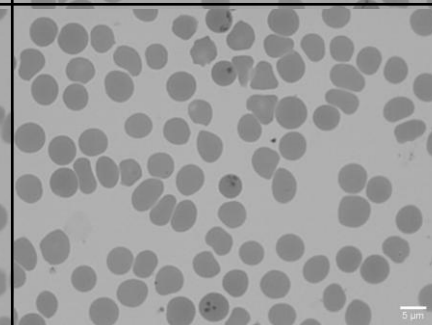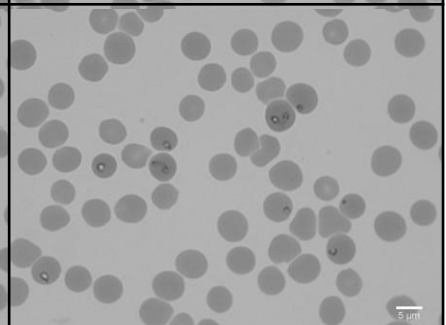

Figure S2

36 hours

Well-1

Well-2

Well-3

Milli-Q water

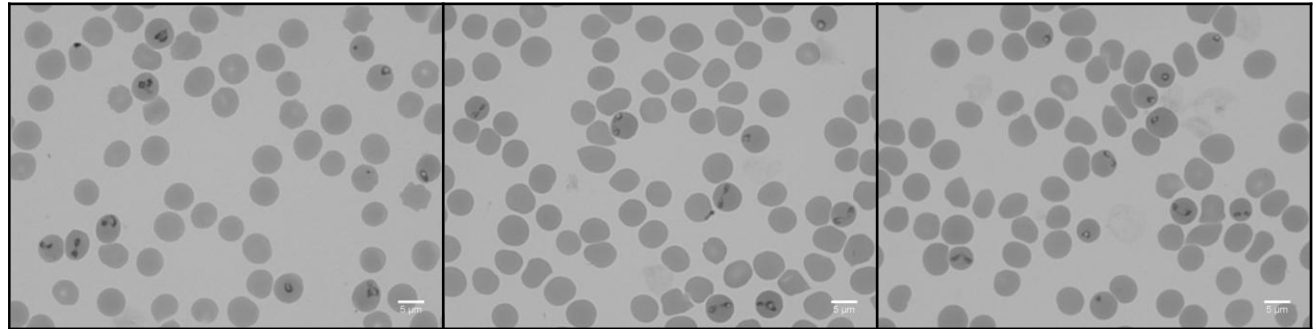

0.04 µM DA

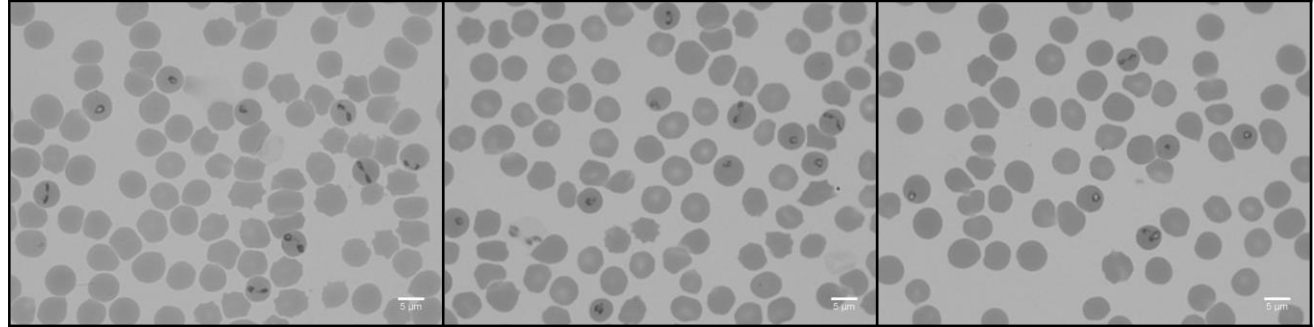

0.3 µM DA

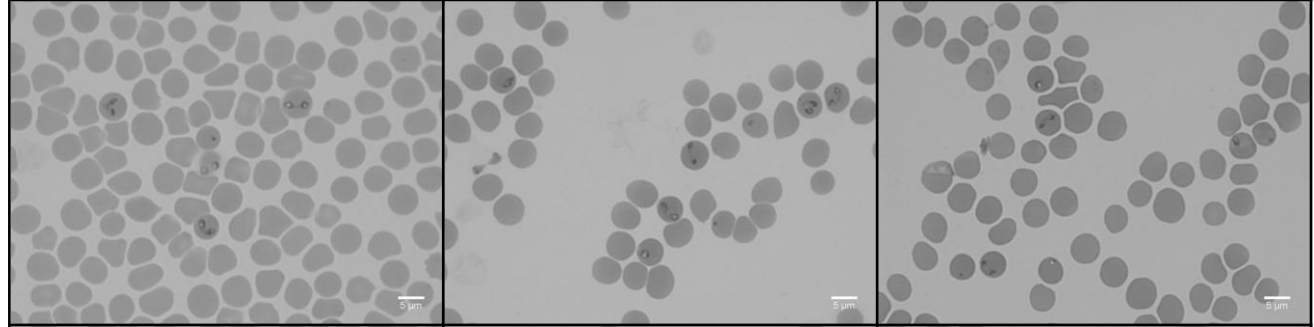

0.75 µM DA

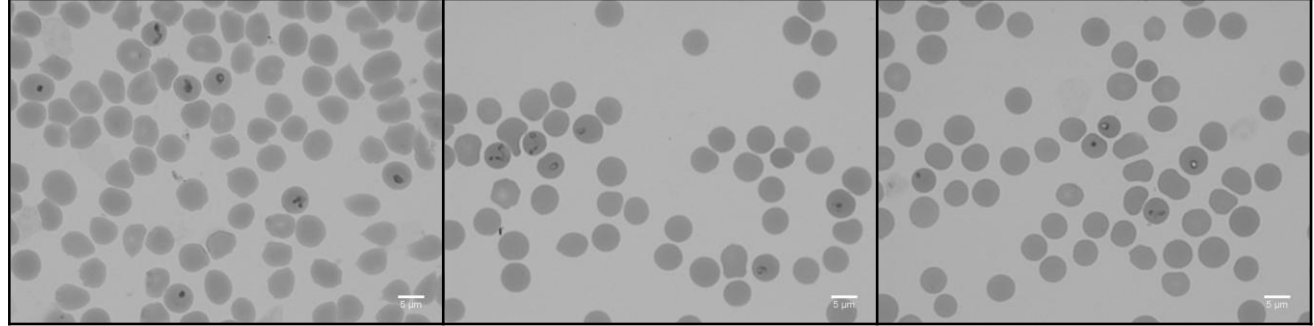

**Figure S3**

48 hours

DMSO

1  $\mu$ M CF

1.5  $\mu$ M CF

2  $\mu$ M CF

Well-1

Well-2

Well-3

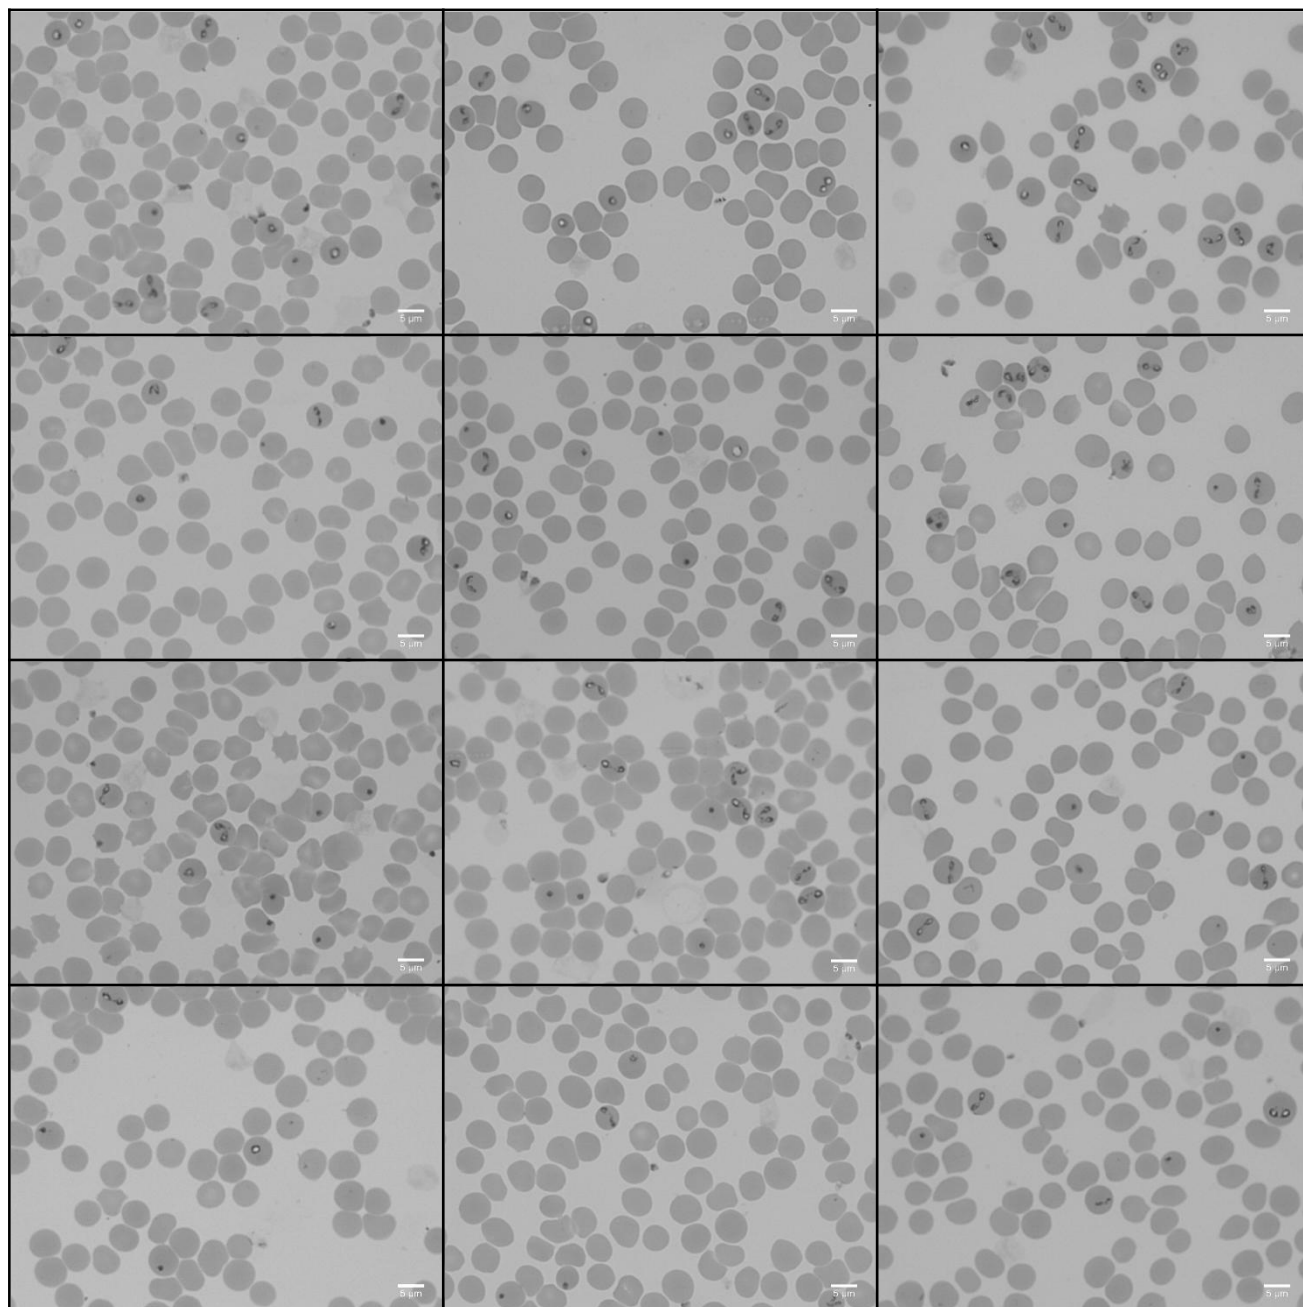

**Figure S4**

48 hours

Well-1

Well-2

Well-3

Milli-Q water

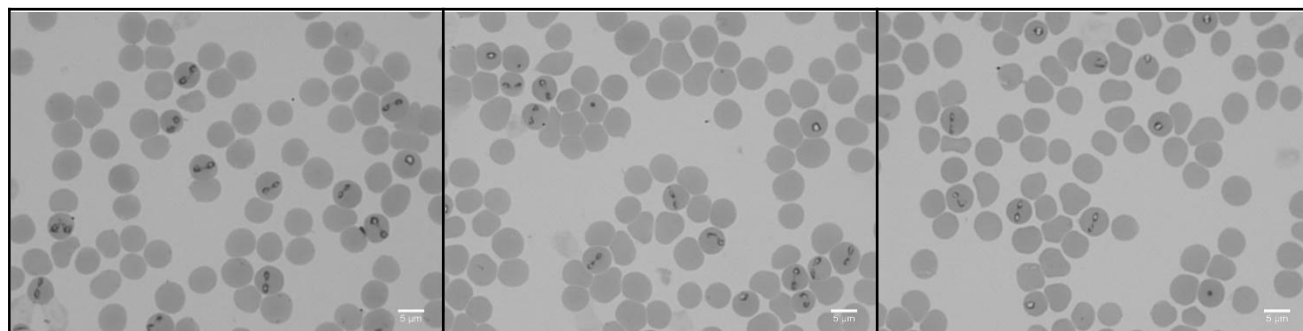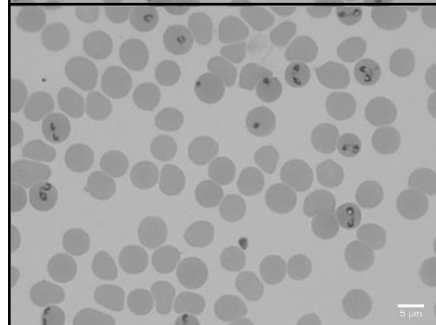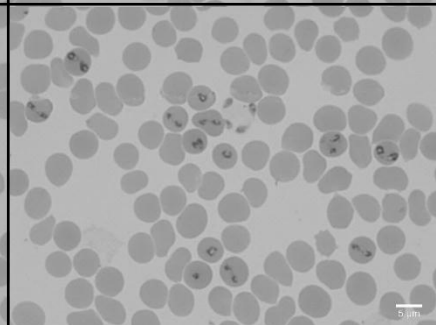

0.04 μM DA

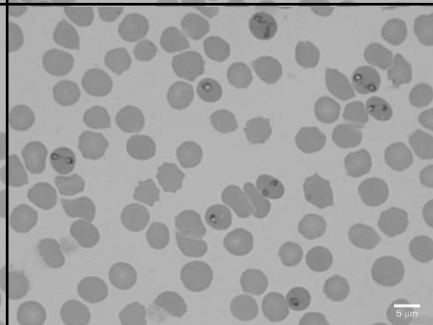

0.3 μM DA

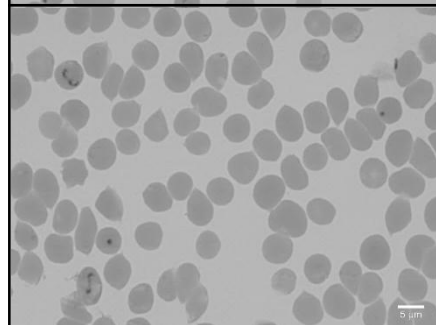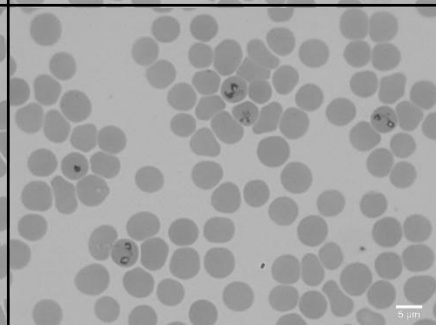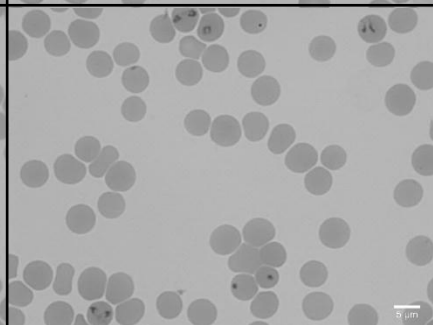

0.75 μM DA

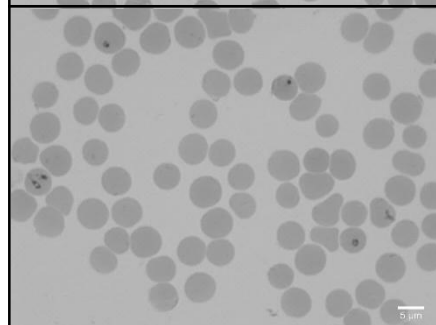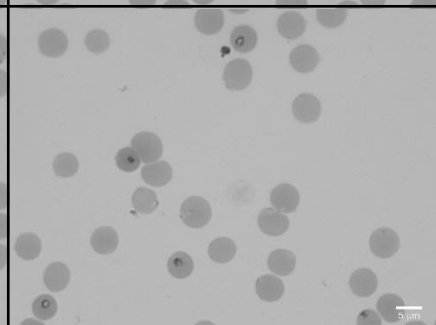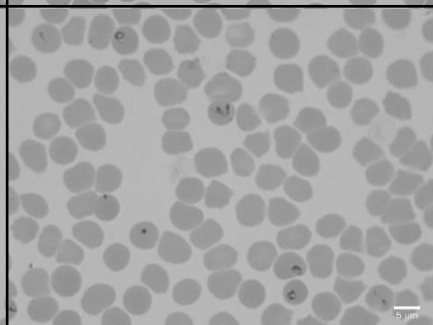

Figure S5
